# Supplementary material
Source: HighWire-hosted journal article supplement (https://www.ghspjournal.org/highwire/filestream/6408/field_highwire_adjunct_files/0/GHSP-D-21-00667-supplement.pdf)
Supplement: GHSP-D-21-00667-supplement.pdf [file GHSP-D-21-00667-supplement.pdf]

**Supplement to:** AHI Partnership Collaborative for Supportive Supervision and Mentoring. Improving primary care quality through supportive supervision and mentoring: lessons from the African Health Initiative in Ethiopia, Ghana, and Mozambique. *Glob Health Sci Pract.* 2022;10(Suppl 1): e2100667. <https://doi.org/10.9745/GHSP-D-21-00667>

### Supplement Table. Causal Pathway Model Terms and Definitions

| <b>Term</b>             | <b>Definition</b>                                                                                                                                                                                                        |
|-------------------------|--------------------------------------------------------------------------------------------------------------------------------------------------------------------------------------------------------------------------|
| Implementation strategy | Set of activities identified based on assessment of program stakeholders, contexts, and likely barriers and facilitators that aims to trigger systems changes and achieve better primary health care worker performance. |
| Determinants            | Factors that enable or hinder the implementation strategy for eliciting the desired effect (i.e., barriers and facilitators).                                                                                            |
| Preconditions           | Factors or circumstances necessary for an implementation strategy to trigger desired systems changes and achieve desired outcomes.                                                                                       |
| Action targets          | The level of the health system or context at which determinants operate.                                                                                                                                                 |
| Outer setting           | The economic, political, policy, social, and cultural context within which the implementing organization resides.                                                                                                        |
| Inner setting           | The entities that comprise the implementing organization, including its structural characteristics, communication networks, culture, climate, and readiness to implement.                                                |
| Individual              | Characteristics of the individual people that are members of the implementing organization (e.g., their skills and competencies, self-efficacy, and self-identification within their organization).                      |
| Process                 | The ways in which members of the implementing organization plan, engage, execute, reflect, and evaluate to carry out the implementation strategy.                                                                        |
| Mediator                | Factors or processes that account for the relationship between the implementation strategy and the implementation outcome (i.e., how an implementation strategy has an effect).                                          |
| Moderators              | Factors that increase or decrease the influence and effectiveness of an implementation strategy.                                                                                                                         |
| Change mechanisms       | The event through which an implementation strategy operates to affect desired outcomes.                                                                                                                                  |
| Proximal outcomes       | The product of the implementation strategy that is realized because of its specific change mechanism; the immediate, observable outcome in the pathway.                                                                  |
